# Supplementary material for: Emerging SARS-CoV-2 Resistance After Antiviral Treatment
Source: PubMed Central journal article supplement (PMC11425144; doi:10.1001/jamanetworkopen.2024.35431), 2024-09-25
Supplement: jamanetwopen-e2435431-s002.pdf [file jamanetwopen-e2435431-s002.pdf]

## Data Sharing Statement

Tamura. Emerging SARS-CoV-2 Resistance After Antiviral Treatment. *JAMA Netw Open*.  
Published September 25, 2024. doi:10.1001/jamanetworkopen.2024.35431

### Data

**Data available:** Yes

**Data types:** Deidentified participant data, Data dictionary

**How to access data:** [jli@bwh.harvard.edu](mailto:jli@bwh.harvard.edu)

**When available:** With publication

### Supporting Documents

**Document types:** None

### Additional Information

**Who can access the data:** Anyone requesting the data

**Types of analyses:** For sequencing analysis

**Mechanisms of data availability:** With a signed data access agreement
